# Supplementary material for: Long-term, high-rate lithium storage capabilities of TiO2 nanostructured electrodes using 3D self-supported indium tin oxide conducting nanowire arrays
Source: Royal Society of Chemistry journal article supplement (doi:10.1039/c0ee00804d), 2011-01-01
Supplement: c0ee00804d.pdf [file c0ee00804d.pdf]

Supporting Information for

# Long-Term, High-Rate Lithium Storage Capabilities of TiO<sub>2</sub> Nanostructured Electrodes Using 3D Self-Supported Indium Tin Oxide Conducting Nanowire Arrays

**Kyung-Soo Park,<sup>a</sup> Jin-Gu Kang,<sup>a</sup> Young-Jin Choi,<sup>a</sup> Sungjun Lee,<sup>b</sup> Dong-Wan  
Kim<sup>\*c</sup>, and Jae-Gwan Park<sup>\*a</sup>**

<sup>a</sup>Nano-Materials Center, Korea Institute of Science and Technology, Seoul 136-791, Korea

<sup>b</sup>Division of Physical Metrology, Korea Research Institute of Standards and Science, Daejeon 305-600,  
Korea

<sup>c</sup>Department of Materials Science and Engineering, Ajou University, Suwon 443-749, Korea

[\*] To whom correspondence should be addressed. E-mail: [dwkim@ajou.ac.kr](mailto:dwkim@ajou.ac.kr) and [jgpark@kist.re.kr](mailto:jgpark@kist.re.kr)

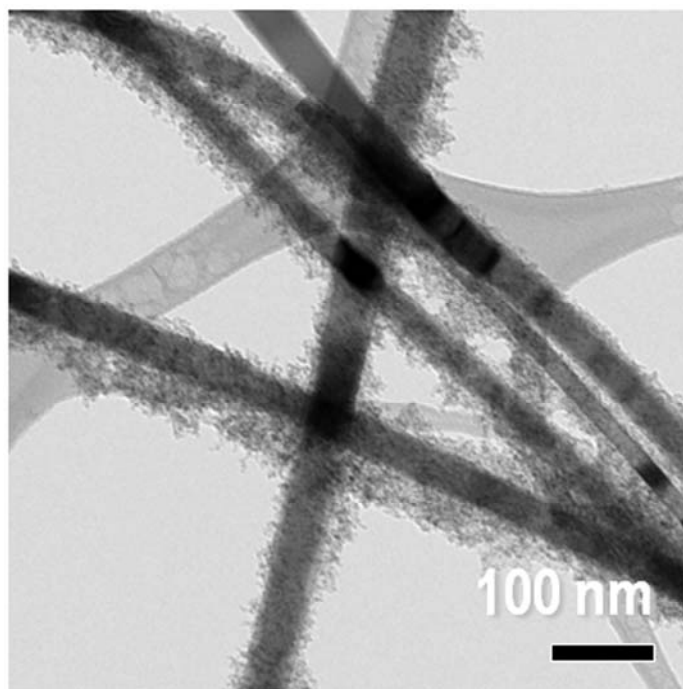

**Figure S1.** Typical TEM image of ITO/TiO<sub>2</sub> hybrid nanowires.

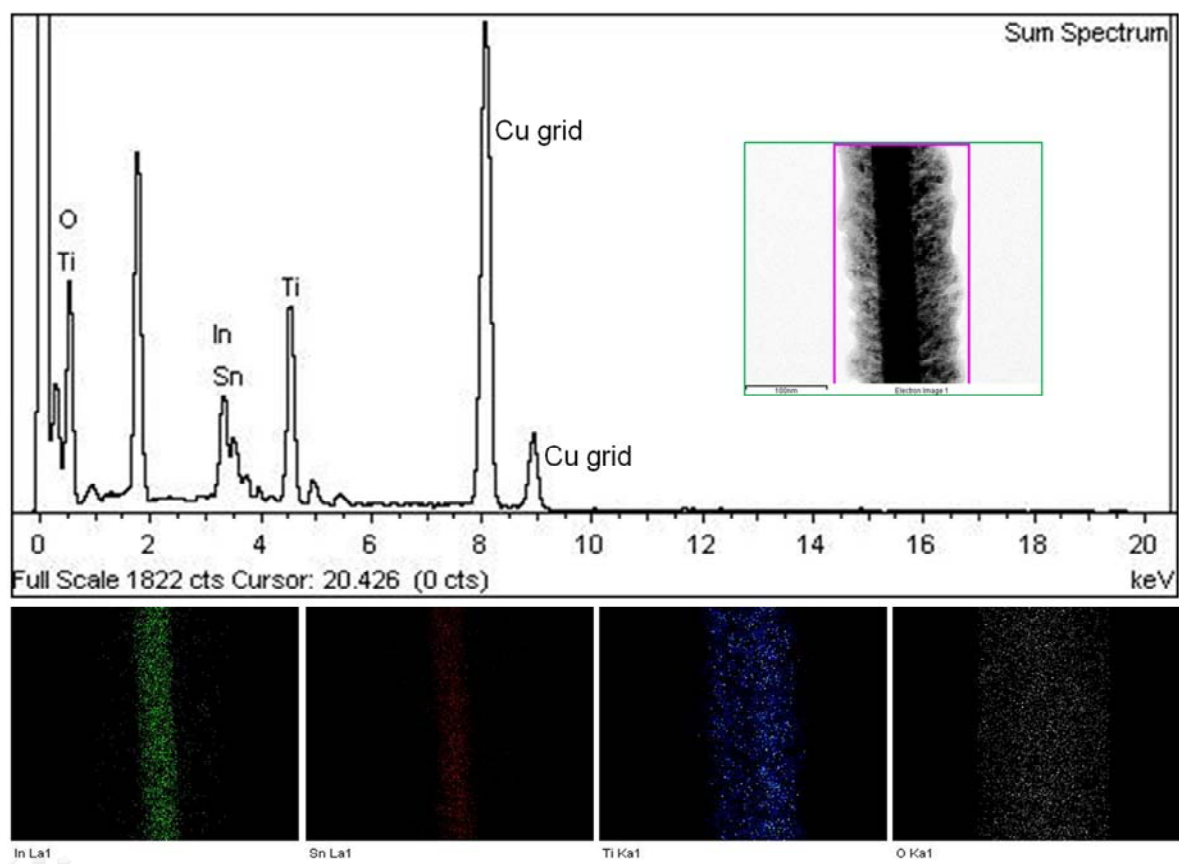

**Figure S2.** EDS elemental mapping results of an individual ITO/TiO<sub>2</sub> nanowire, marked by a red square region in the inset.

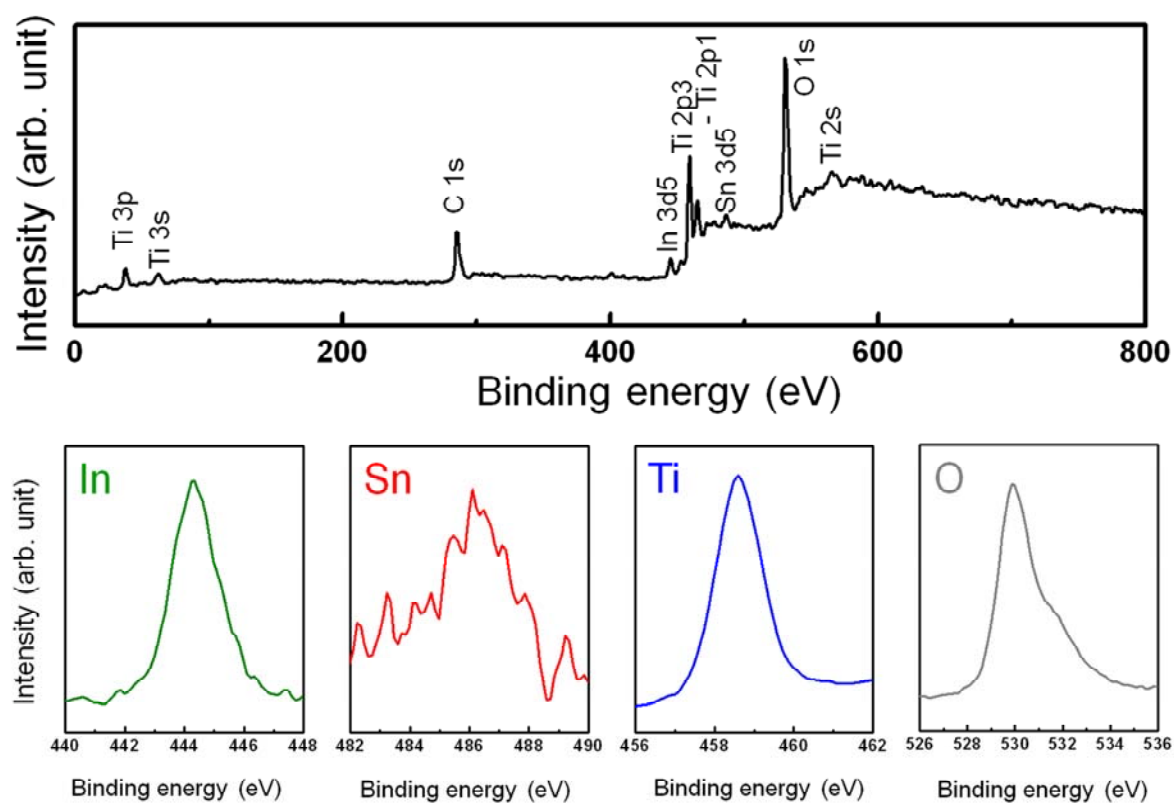

**Figure S3.** Wide and narrow scan XPS spectra for a bundle of the ITO/TiO<sub>2</sub> hybrid nanowires.

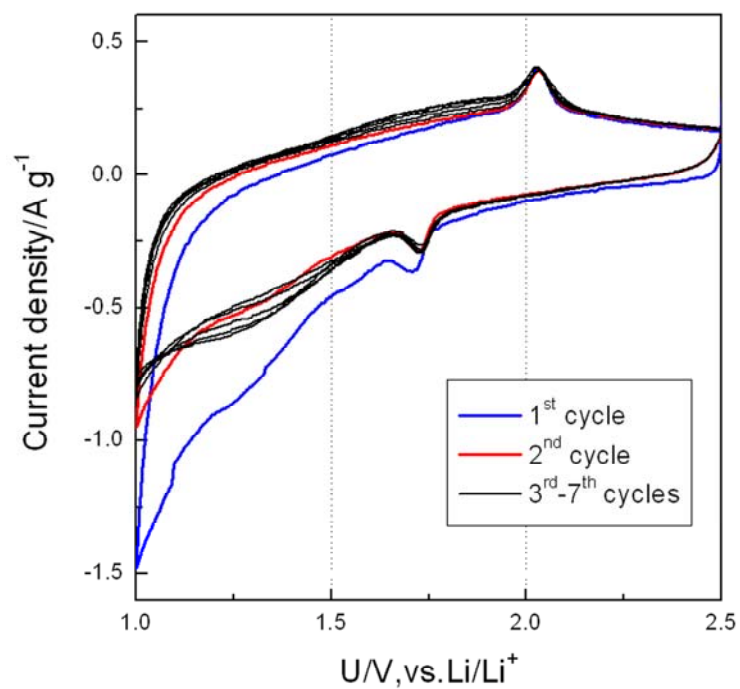

**Figure S4.** Typical cyclic voltammetry of the ITO/TiO<sub>2</sub> hybrid nanostructured electrode at a scanning rate of 0.2 mV s<sup>-1</sup>.

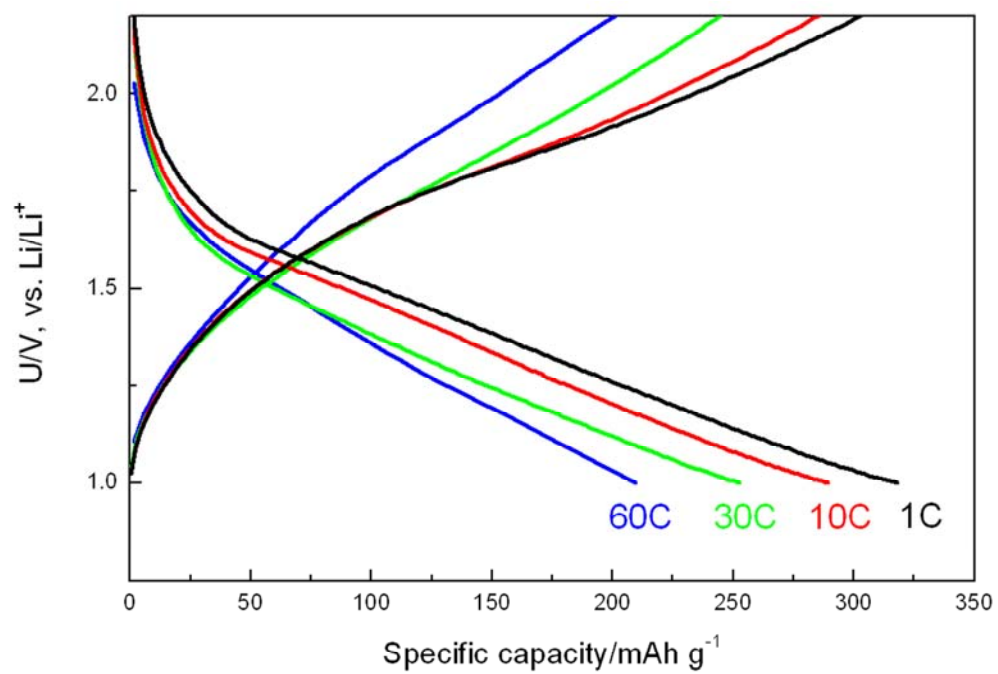

**Figure S5.** Charging-discharging curves of an ITO/TiO<sub>2</sub> hybrid nanostructured electrode at different C rates.

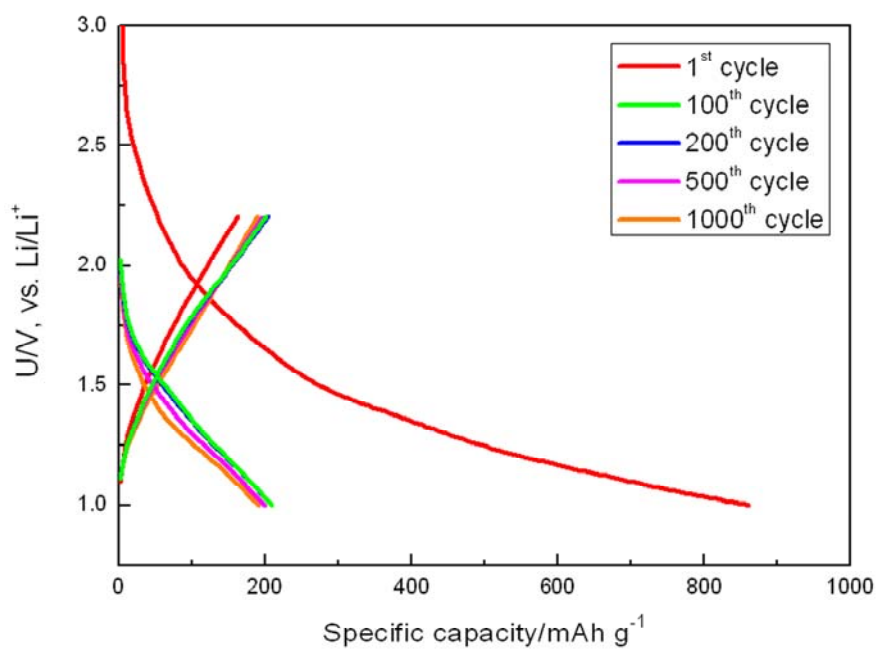

**Figure S6.** Charging-discharging curves of an ITO/TiO<sub>2</sub> hybrid nanostructured electrode.

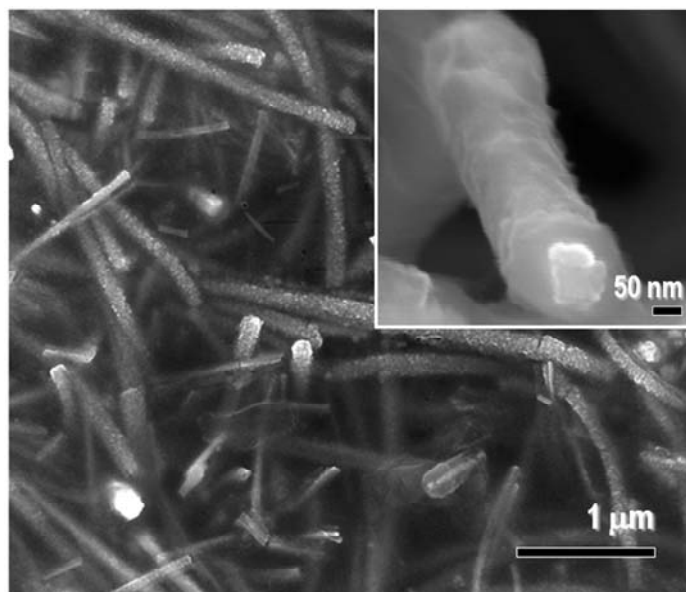

**Figure S7.** SEM image of a fully lithiated ITO/TiO<sub>2</sub> hybrid nanostructured electrode (taken after 400 cycles). The Inset shows the FE-SEM image of a fully lithiated individual nanowire.
